# Supplementary material for: Polymorphism of (H2mela)2[CuCl5]Cl (mela = melamine): structures, transformation and magnetic properties
Source: Royal Society of Chemistry journal article supplement (doi:10.1039/c1ce05143a), 2011-01-01
Supplement: c1ce05143a.pdf [file c1ce05143a.pdf]

## Polymorphism of $(\text{H}_2\text{mela})_2[\text{CuCl}_5]\text{Cl}$ (mela = melamine): Structures, Transformation and Magnetic Properties

Dan-Feng Weng, Bing-Wu Wang, Zhe-Ming Wang\* and Song Gao\*

Beijing National Laboratory for Molecular Sciences, State Key Laboratory of Rare Earth Materials Chemistry and Applications, College of Chemistry and Molecular Engineering, Peking University, Beijing 100871 (China) Email: gaosong@pku.edu.cn, zmw@pku.edu.cn

### Electronic supplementary information

**Table S1.** IR absorption bands [ $\text{cm}^{-1}$ ] and their assignments for **1** and **2** (s: strong, m: medium, w: weak, sh: shoulder, br: broad).

|                    | <b>1</b>       | <b>2</b>       |
|--------------------|----------------|----------------|
| N–H stretching     | 3334 (sh)      | 3338(sh)       |
|                    | 3270 (m)       | 3278 (m)       |
|                    | 3131 (m)       | 3134 (m)       |
|                    | 3060 (m)       | 3038 (m)       |
|                    | 2900 (m-w, br) | 2888 (m-w, br) |
|                    | 2748 (m-w)     | 2739 (m-w)     |
| N–H bending        | 1696 (vs)      | 1694 (vs)      |
|                    |                | 1666 (s)       |
| C=N                | 1500 (m)       | 1509 (m)       |
| C–N                | 1123 (m-w)     | 1123 (m-w)     |
| Cu–Cl (equatorial) | 277 (w)        | 254 (w)        |
|                    | 235 (w)        |                |
| Cu–Cl (axial)      | 204 (w)        | 200 (w)        |

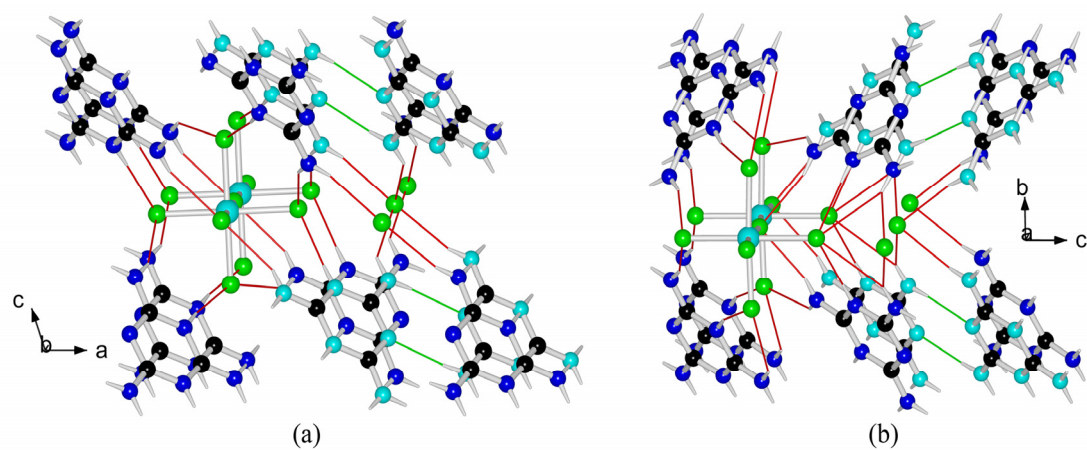

**Figure S1.** The H-bonding around the  $[\text{CuCl}_5^{3-}]_n$  chains in **1** (a) and **2** (b). The intramolecular H-bonds in the H-bonded dimers of  $[\text{H}_2\text{mela}^{2+}]_2$  are showed in thin green bonds, other H-bonds are showed in thin red bonds. Atomic color scheme: Cu, cyan; N, blue; C, black; C in  $[\text{H}_2\text{mela}^{2+}]_2$  dimers, small cyan ball; H, white.

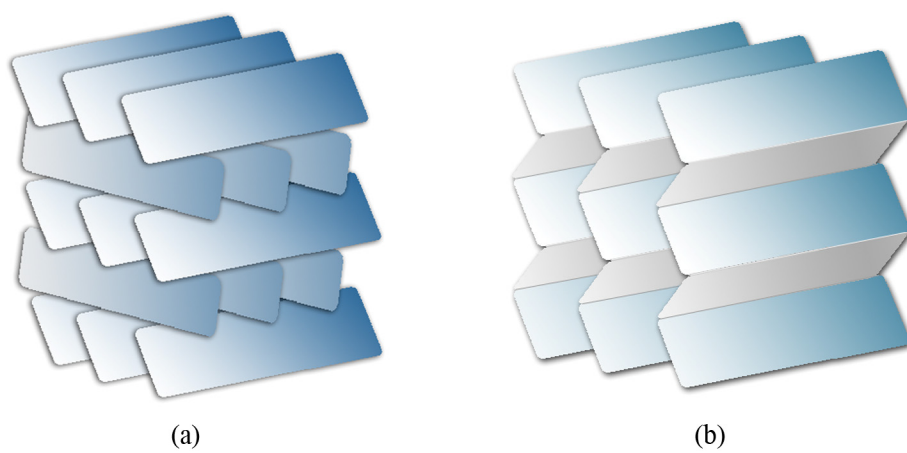

**Figure S2.** Schematic diagrams of packing of strips of mela dimers in **1** (a) and **2** (b).

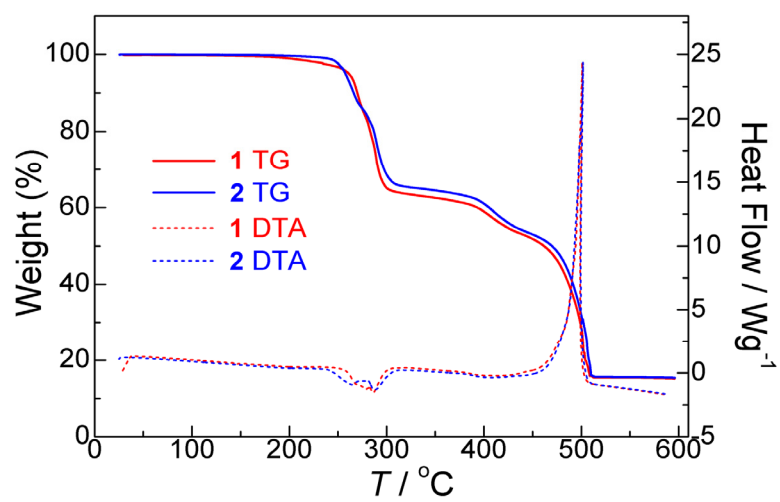

**Figure S3.** Combined TGA/DSC runs for **1** (red) and **2** (blue) at a rate of  $5^\circ\text{C}/\text{min}$  under air atmosphere.

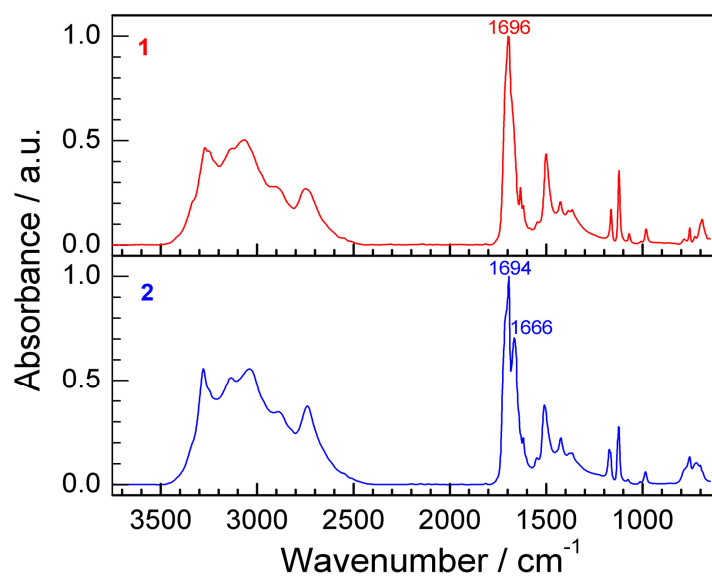

**Figure S4.** IR spectra of **1** (red) and **2** (blue).

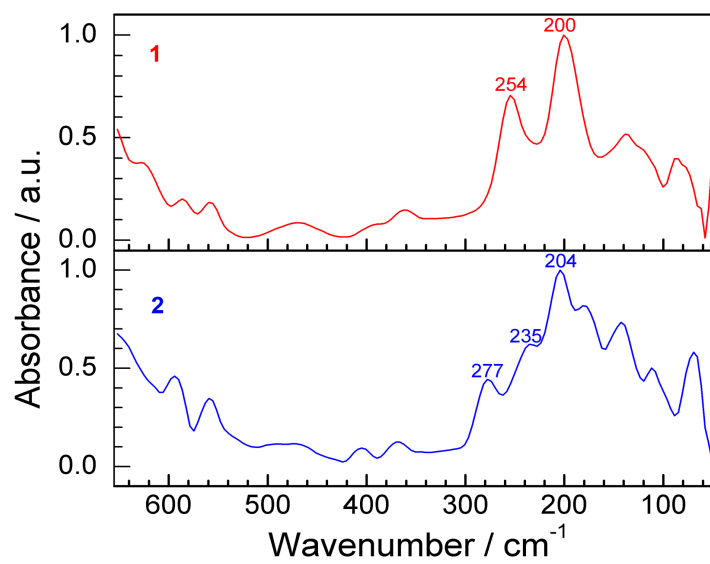

**Figure S5.** FIR spectra of **1** (red) and **2** (blue).

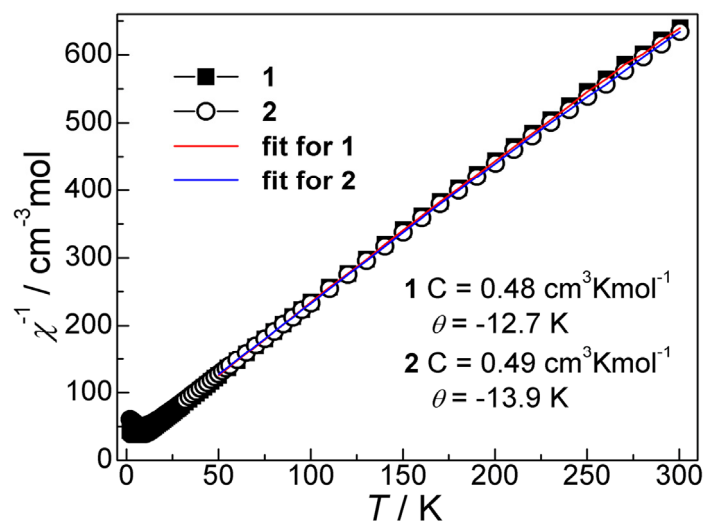

**Figure S6.** The  $1/\chi$  vs  $T$  plots (under 1000 Oe field) for complexes **1** and **2**, red (**1**) and blue (**2**) lines are Curie-Weiss fitting.

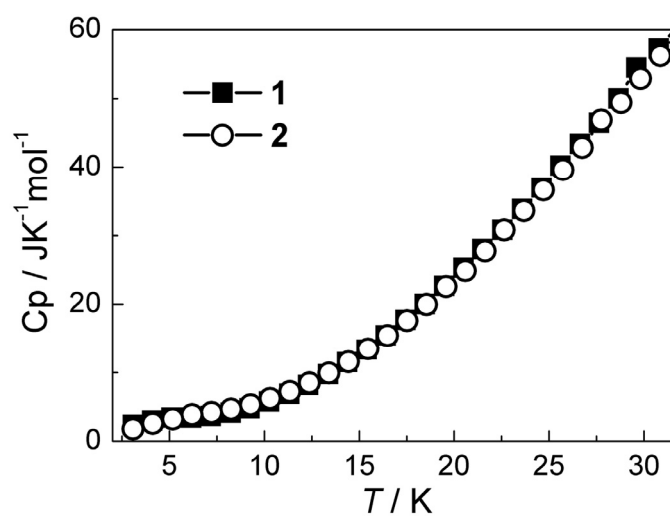

**Figure S7.** Specific heat capacity plots of complexes 1 and 2.



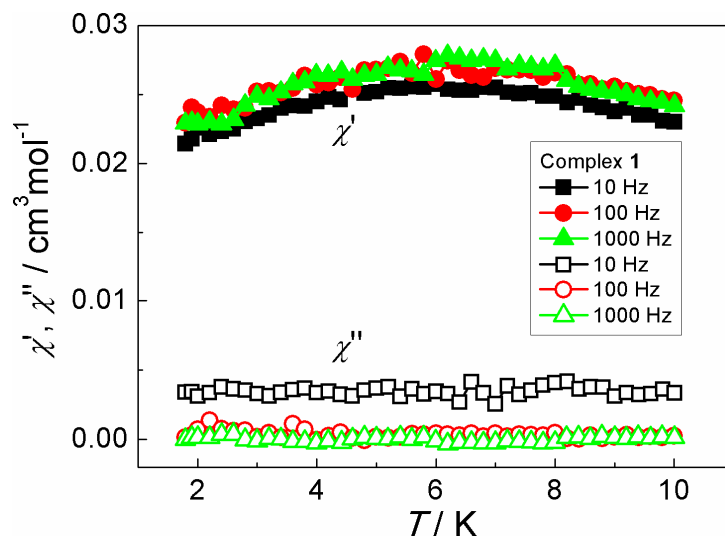

(a)

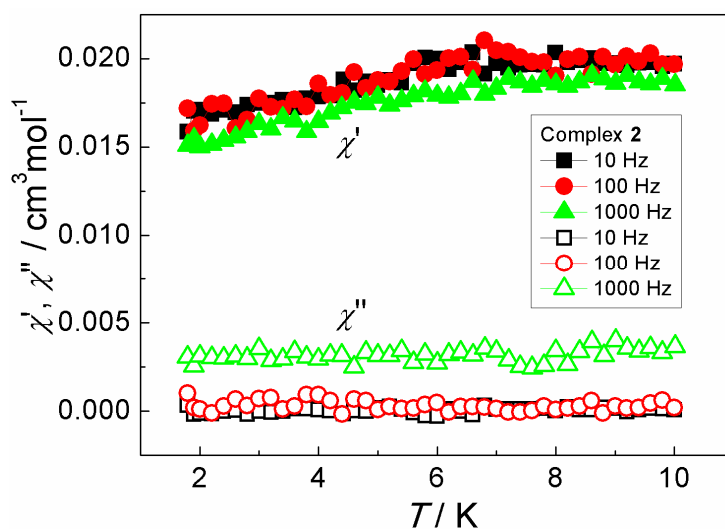

(b)

Figure S8. AC plots of complexes 1 (a) and 2 (b).

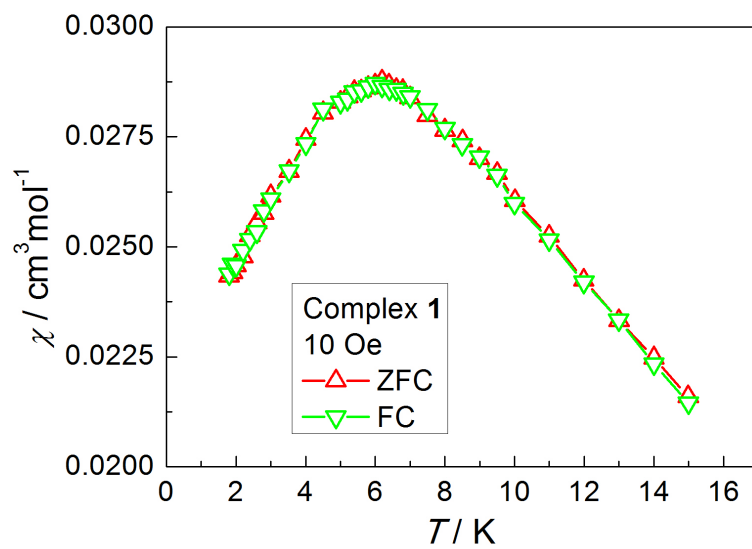

(a)

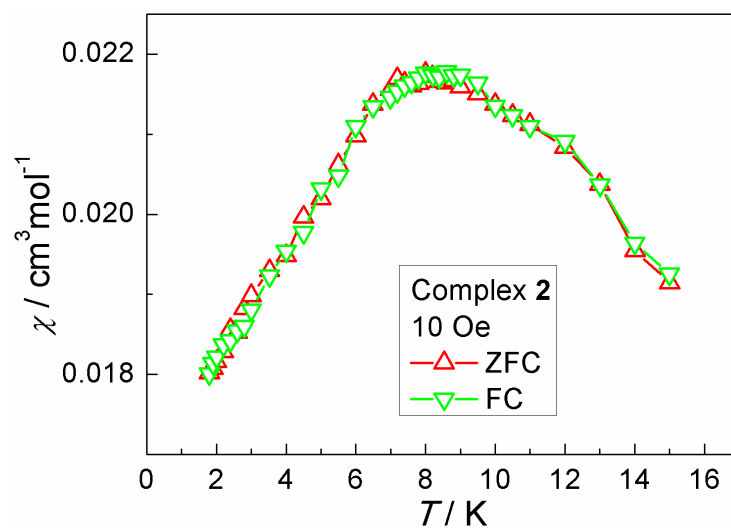

(b)

**Figure S9.** ZFC-FC plots of complexes **1** (a) and **2** (b).
